# Supplementary material for: Carbon nanotube-based magnetic-fluorescent nanohybrids as highly efficient contrast agents for multimodal cellular imaging
Source: Royal Society of Chemistry journal article supplement (doi:10.1039/c0jm00594k), 2010-01-01
Supplement: c0jm00594k.pdf [file c0jm00594k.pdf]

## Supporting Information

# Carbon Nanotube-based Magnetic-fluorescent Nanohybrids as Highly Efficient Contrast Agents for Multimodal Cellular Imaging

Bingdi Chen,<sup>ab</sup> Hui Zhang,<sup>a</sup> Chuanxin Zhai,<sup>a</sup> Ning Du,<sup>a</sup> Chen Sun,<sup>a</sup>

Jingwen Xue<sup>a</sup> and Deren Yang<sup>\*a</sup>

<sup>a</sup>State Key Lab of Silicon Materials and Department of Materials Science and Engineering, Zhejiang University, Hangzhou 310027, People's Republic of China

<sup>b</sup>The Institute for Advanced Materials and Nano Biomedicine, Tongji University, Shanghai 20092, People's Republic of China

Hai Huang,<sup>c</sup> Bo Zhang,<sup>c</sup> Qiuping Xie<sup>c</sup> and Yulian Wu<sup>\*c</sup>

<sup>c</sup>Department of Surgery, the Second Affiliated Hospital, School of Medicine, Zhejiang University, Hangzhou 310027, People's Republic of China.

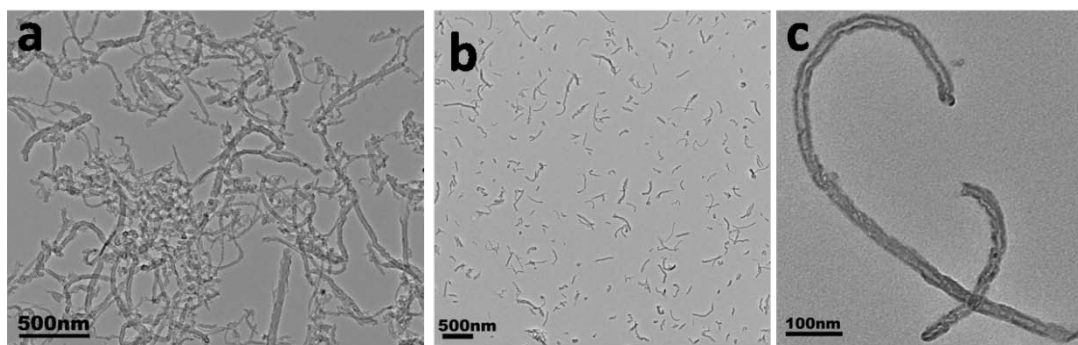

Figure S1 TEM images of (a) CNTs before cut short; (b) CNTs cut short by sonicating

in concentrated sulfuric acid and nitric acid mixture and further polished by sulfuric acid and hydrogen peroxide; (c) magnified image.

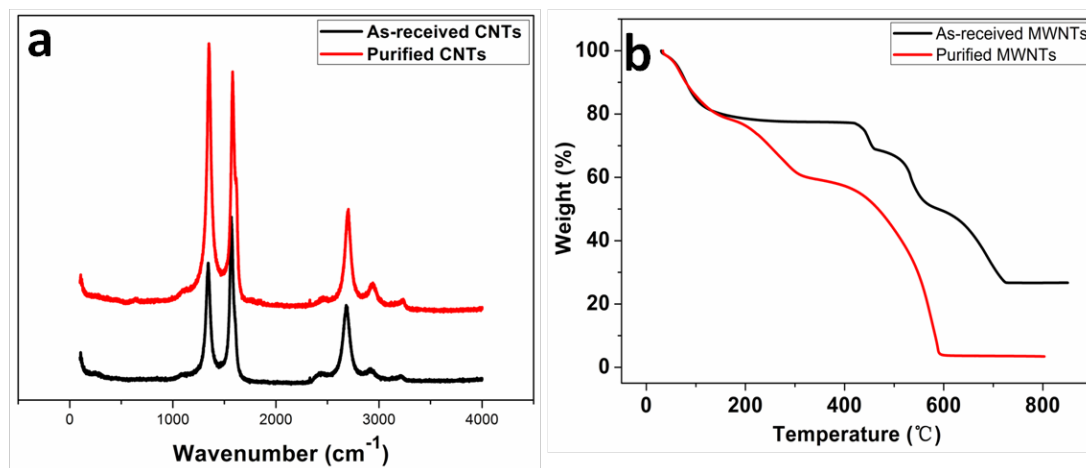

Figure S2 Raman spectra (a) and TGA spectra (b) of as-received CNTs and purified CNTs.

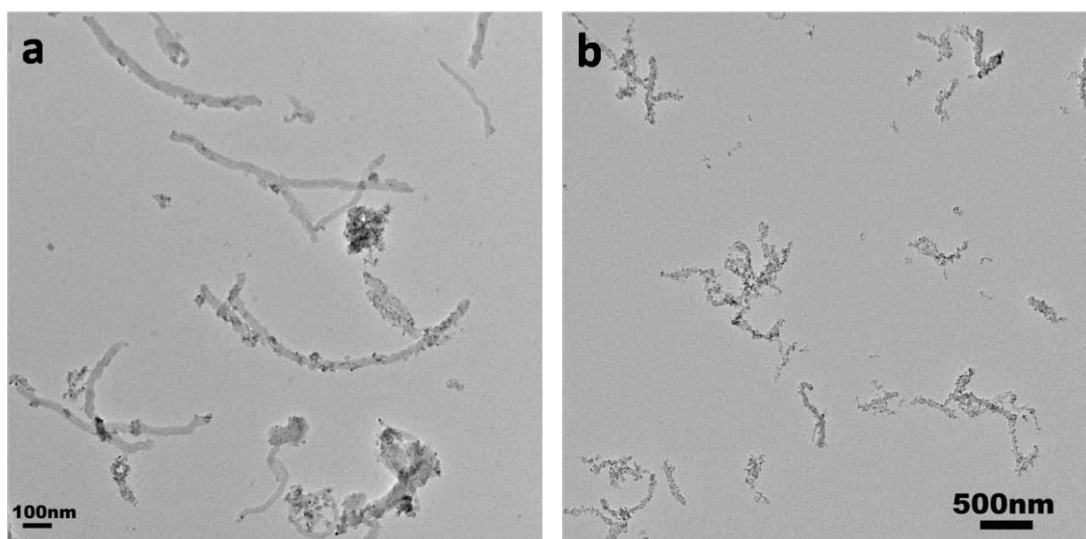

Figure S3 TEM images of CNT-SPIO with different ratio of SPIO and CNTs.

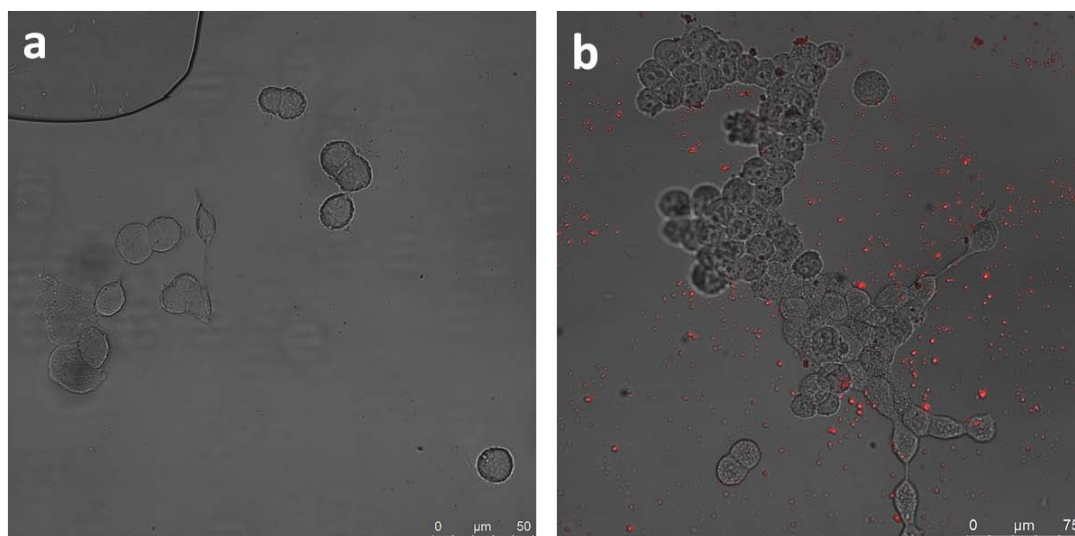

Figure S4 Confocal fluorescence images of (a) unlabeled and (b) SPIO-CdTe labeled HEK 293T cells.

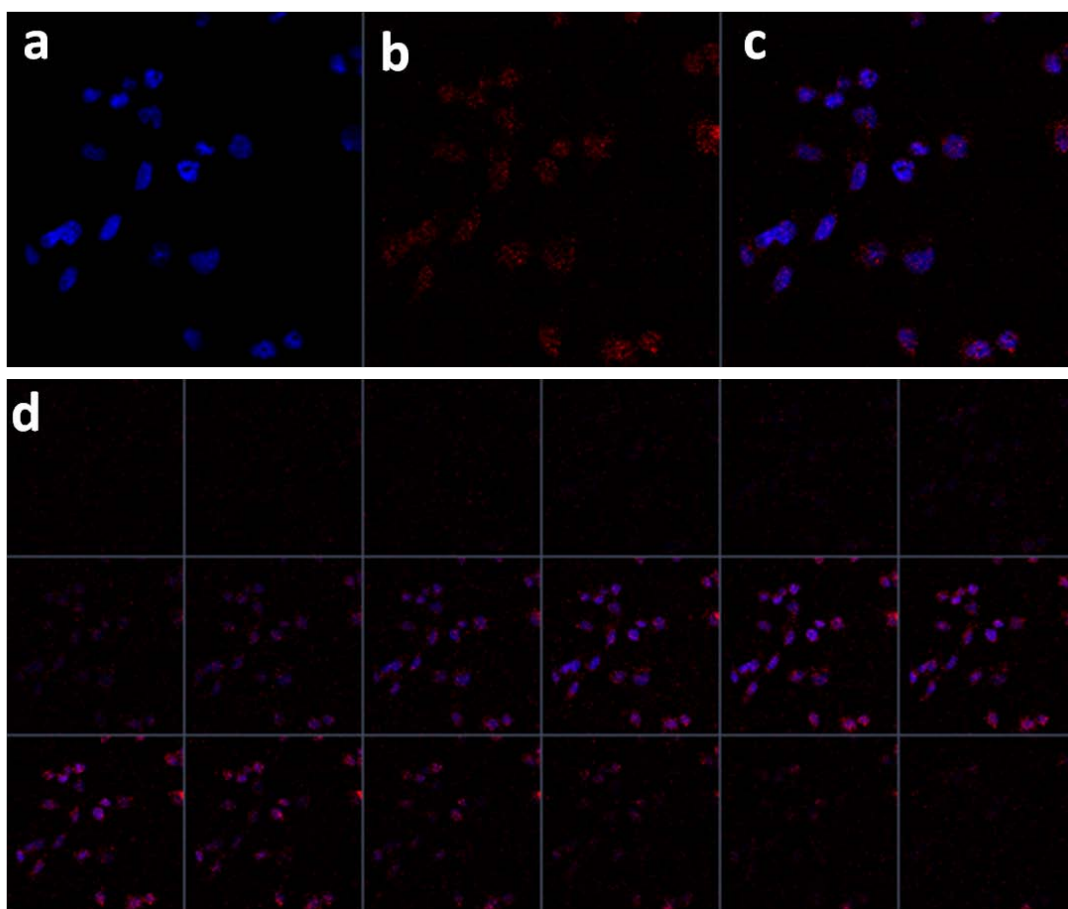

Figure S5 Confocal fluorescent images of HEK 293T cells incubated with CNT-SPIO-CdTe nanohybrids with Cd concentration of 5 μg/ml: (a) fluorescence

image of nuclei illuminated with blue; (b) fluorescence image showing CNT-SPIO-CdTe color only; (c) overlaid image of HEK 293T cells; (d) Z-stack image of interiors of cells.

Table 1 Quantum yield of the hybrid and pure CdTe

| Sample        | $\lambda_{\text{ex}}$ (nm) | $\lambda_{\text{em}}$ (nm) | A     | F      | G <sub>x</sub> /G <sub>s</sub> | QY (%) |
|---------------|----------------------------|----------------------------|-------|--------|--------------------------------|--------|
| Rhodamine B   | 325                        | 576                        | 0.041 | 412409 |                                | 97     |
| CdTe          | 325                        | 695                        | 0.067 | 201462 | 0.299                          | 29     |
| CNT-SPIO-CdTe | 325                        | 720                        | 0.081 | 121340 | 0.149                          | 14     |

A: Absorption intensity; F: Integrated fluorescence intensity; G=F/A.  $\Phi_x = \Phi_s \left( \frac{G_x}{G_s} \right) \left( \frac{\eta_x}{\eta_s} \right)^2$
